# Supplementary material
Source: PubMed Central journal article supplement (PMC2361424)
Supplement: ajrccm_177_9_983__1.pdf [file ajrccm_177_9_983__1.pdf]

**Inflammasome mRNA expression in human monocytes during early septic shock**

Ruairi J Fahy, Matthew C Exline, Mikhail A Gavrilin, Nitin Y Bhatt, Beth Y Besecker, Anasuya Sarkar, Jennifer L Hollyfield, Michelle D Duncan, Haikady N. Nagaraja, Nina L. Knatz, Mark Hall and Mark D Wewers

Online Data Supplement

**Table E1. Septic shock exclusion criteria**

---

| <b>Exclusion Criteria</b>                                                                                 |
|-----------------------------------------------------------------------------------------------------------|
| Pregnancy or breast-feeding                                                                               |
| Age <18 yr                                                                                                |
| Human immunodeficiency virus infection in association with a last known CD4 count of < 50/mm <sup>3</sup> |
| History of bone marrow, lung, liver, pancreas, or small-bowel transplantation                             |
| Chronic renal failure requiring hemodialysis or peritoneal dialysis                                       |
| Participation in another investigational study within 30 days before the current study                    |
| Leukocytosis or leukopenia due chemotherapy, hematological malignancies or leukocyte transfusions         |
| Patients taking > 10 mg of prednisone or its equivalent                                                   |

---

**Table E2. Nomenclature Used in Manuscript**

| <b>Usage in Manuscript</b> | <b>Gene</b> | <b>Synonyms</b>        |
|----------------------------|-------------|------------------------|
| ASC                        | PYCARD      | TMS-1                  |
| caspase-1                  | CASP1       | ICE                    |
| caspase-5                  | CASP5       | ICErel III             |
| IPAF                       | NLRC4       | CLAN, CARD12           |
| NALP1                      | NLRP1       | DefCap, CARD7          |
| NALP3                      | NLRP3       | Cryopyrin, Pypaf-1     |
| Pypaf-7                    | NLRP12      | Monarch1,              |
| pyrin                      | MEFV        | Marenostrin, TRIM20    |
| IL-1 $\beta$               | IL1B        | LAF, EP, IL-1F2        |
| IL-6                       | IL6         | Interferon $\beta$ 2   |
| TNF $\alpha$               | TNF         | cachectin              |
| IL-10                      | IL10        | -                      |
| IL-1ra                     | IL1RN       | -                      |
| IL-18                      | IL18        | IGIF,IL-1F4            |
| I $\kappa$ B $\alpha$      | NFKBIA      | MAD3                   |
| IRAK-1                     | IRAK1       | Pelle                  |
| IRAK-2                     | IRAK2       | -                      |
| IRAK-M                     | IRAK3       | -                      |
| MAIL                       | NFKB1Z      | I $\kappa$ Bzeta, INAP |
| NF- $\kappa$ B p50         | NFKB1       | P105                   |
| NF $\kappa$ B p65          | RELA        | NFKB3                  |
| NOD-1                      | NOD1        | CARD4                  |
| NOD-2                      | NOD2        | CARD15                 |
| RIP-2                      | RIP2K       | CARDIAK,RICK,CARD3     |
| TLR-2                      | TLR2        | -                      |
| TLR-4                      | TLR4        | -                      |
